# Supplementary material for: Enhanced antigen cross-presentation in human colorectal cancer-associated fibroblasts through upregulation of the lysosomal protease cathepsin S
Source: PubMed Central journal article supplement — J Immunother Cancer. 2022 Mar 9;10(3):e003591. doi: 10.1136/jitc-2021-003591 (PMC8915372; doi:10.1136/jitc-2021-003591), 2022-03-09
Supplement: jitc-2021-003591supp002.pdf [file jitc-2021-003591supp002.pdf]

# Supplementary Figure 1

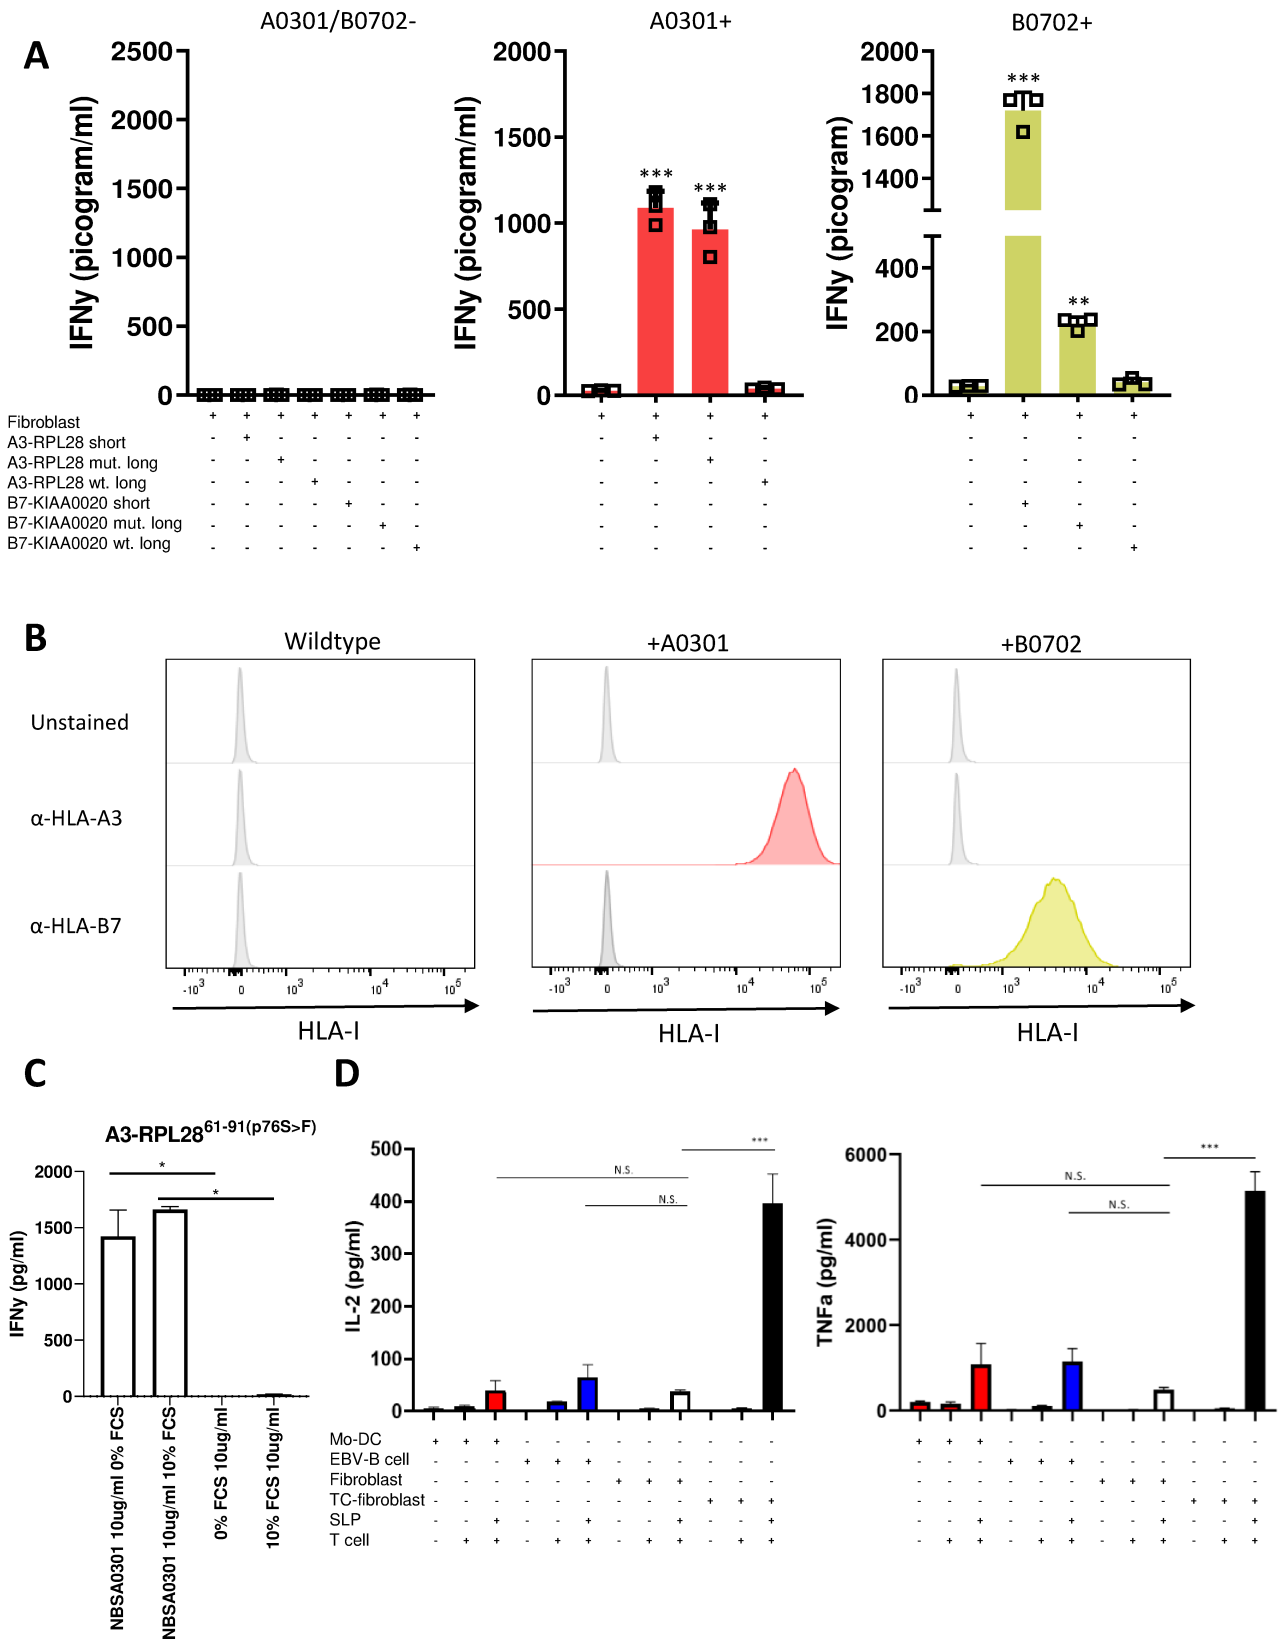

**Supplementary figure 1. A** IFN $\gamma$  production by neoantigen-specific T cells (T-cell bulk reactive to both the A3 and B7-epitopes) after 24h co-incubation with antigen presenting human normal skin-derived fibroblasts (20  $\mu$ g/ml SLP, 2  $\mu$ g/ml SSP). The different panels show different normal skin-derived CAFs with differential HLA-haplotypes. Experimental conditions are compared to the T cell – fibroblast only condition with 1-way ANOVA \*\*\*= $p \leq 0.0001$ , \*\*= $p \leq 0.001$  **B** HLA-A3-/B7- NBS fibroblasts were retrovirally transduced with HLA-A3 or HLA-B7 and expression was confirmed by FACS. **C** IFN $\gamma$  production by neoantigen-specific T cells after 24h co-incubation with either A3-RPL28<sup>61-91(p76S>F)</sup> loaded-fibroblasts or A3-RPL28<sup>61-91(p76S>F)</sup> only, under serum-containing and serum-free conditions. Means with SD are plotted from representative experiments (n=2). Student's t test \*= $p \leq 0.05$  **D** IL-2 and TNF $\alpha$  expression by T cells after A3-RPL28<sup>61-91(p76S>F)</sup> presentation by either professional APCs (Mo-DC & EBV-B cell) and (tumor-conditioned) NBS fibroblasts. Mo-DC=Monocyte-derived Dendritic Cell, EBV-B cell=Epstein-Barr Virus immortalized B cell, TC-fibroblast=tumor-conditioned fibroblast N.S.= not significant, \*\*\* $p \leq 0.0001$

# Supplementary Figure 2

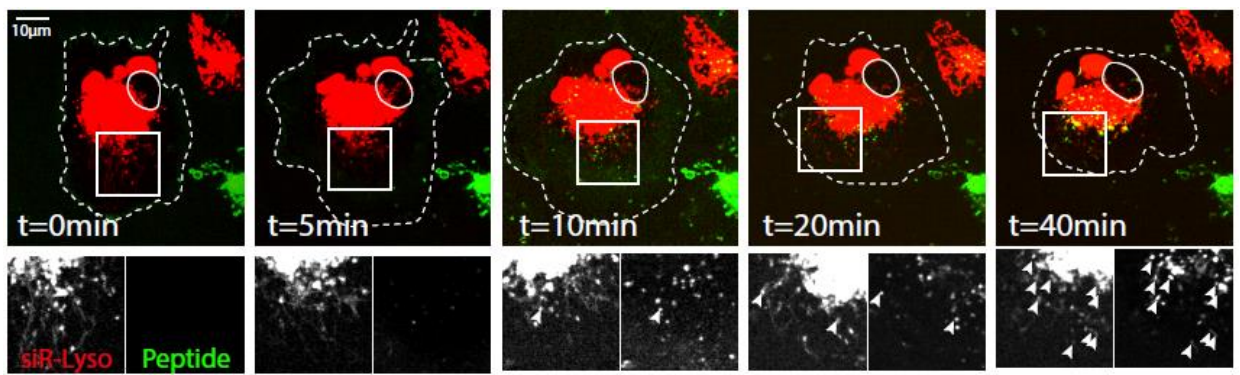

**Supplementary figure 2.** Spinning confocal microscopy shows co-localization of the internally quenched A3-RPL28<sup>61-91(p76S>F)</sup> SLP (green) and the lysosome compartment (red) in professional APCs (Mo-DCs). Dashed line indicates the outlines of the fibroblast. Closed line indicates the location of the nucleus.

# Supplementary Figure 3

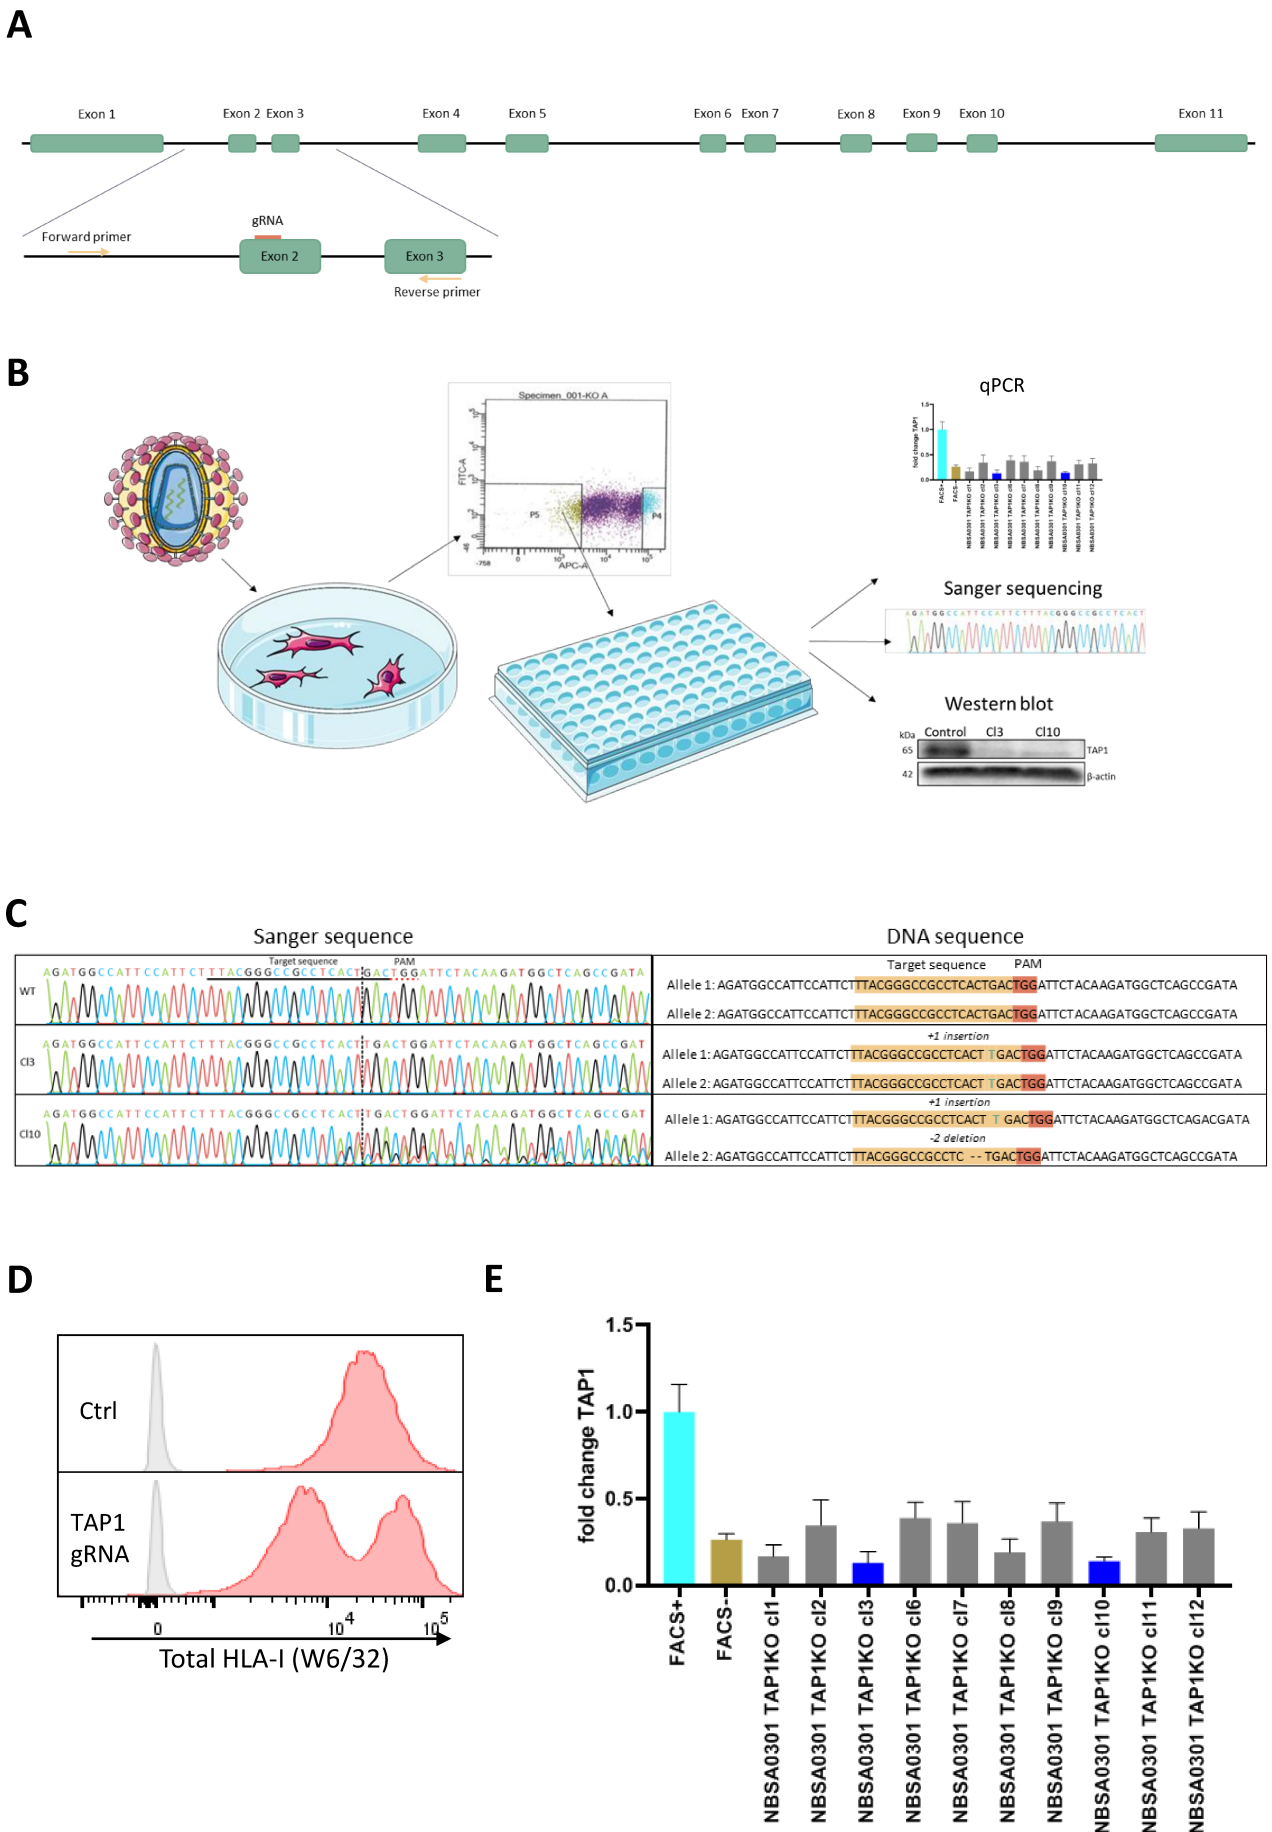

**Supplementary figure 3.** Strategy and verification of TAP1KO in NBS fibroblasts. **A** gRNA design (exon 2) and PCR strategy to detect TAP1KO. **B** FACS sort strategy and TAP1KO verification. **C** Sanger sequence chromatograms of TAP1KO fibroblast clones and vector control. **D** HLA-I expression in NBS fibroblast bulk after transduction with either TAP1-targeting gRNA or an empty vector control. **E** Relative expression of TAP1 mRNA in HLA-low sorted fibroblast clones compared to the HLA-high fibroblast-sorted population. Clones in blue were used for TAP1KO validation and subsequent experiments.

# Supplementary Figure 4

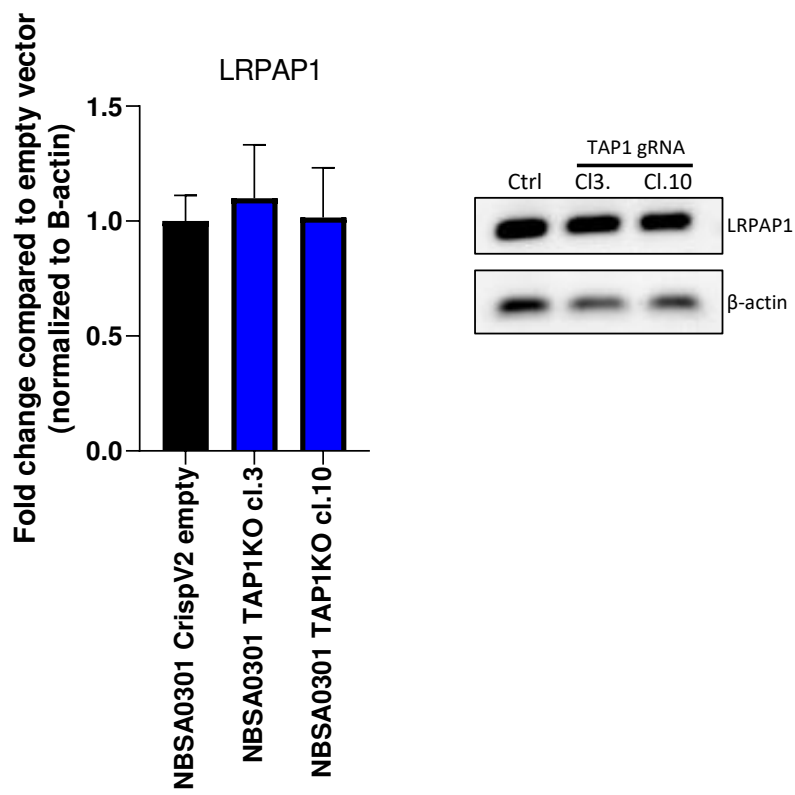

**Supplementary figure 4.** LRPAP1 expression in TAP1KO fibroblasts. Expression of LRPAP1 in TAP1KO (blue bars) and vector control (black bar) conditions (left panel). After RT-qPCR, amplicons were subjected to gel electrophoresis and imaged (right panel).



# Supplementary Figure 5

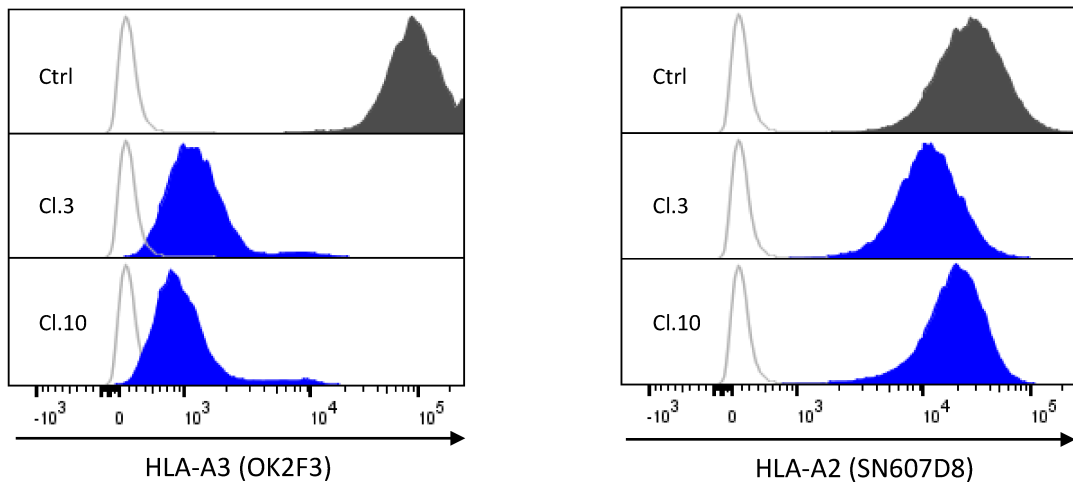

**Supplementary figure 5.** Expression of HLA-A3 and HLA-A2 on TAP1KO fibroblasts. Expression of surface HLA-A3 and HLA-A2 in TAP1KO and vector control conditions determined by FACS.

# Supplementary Figure 6

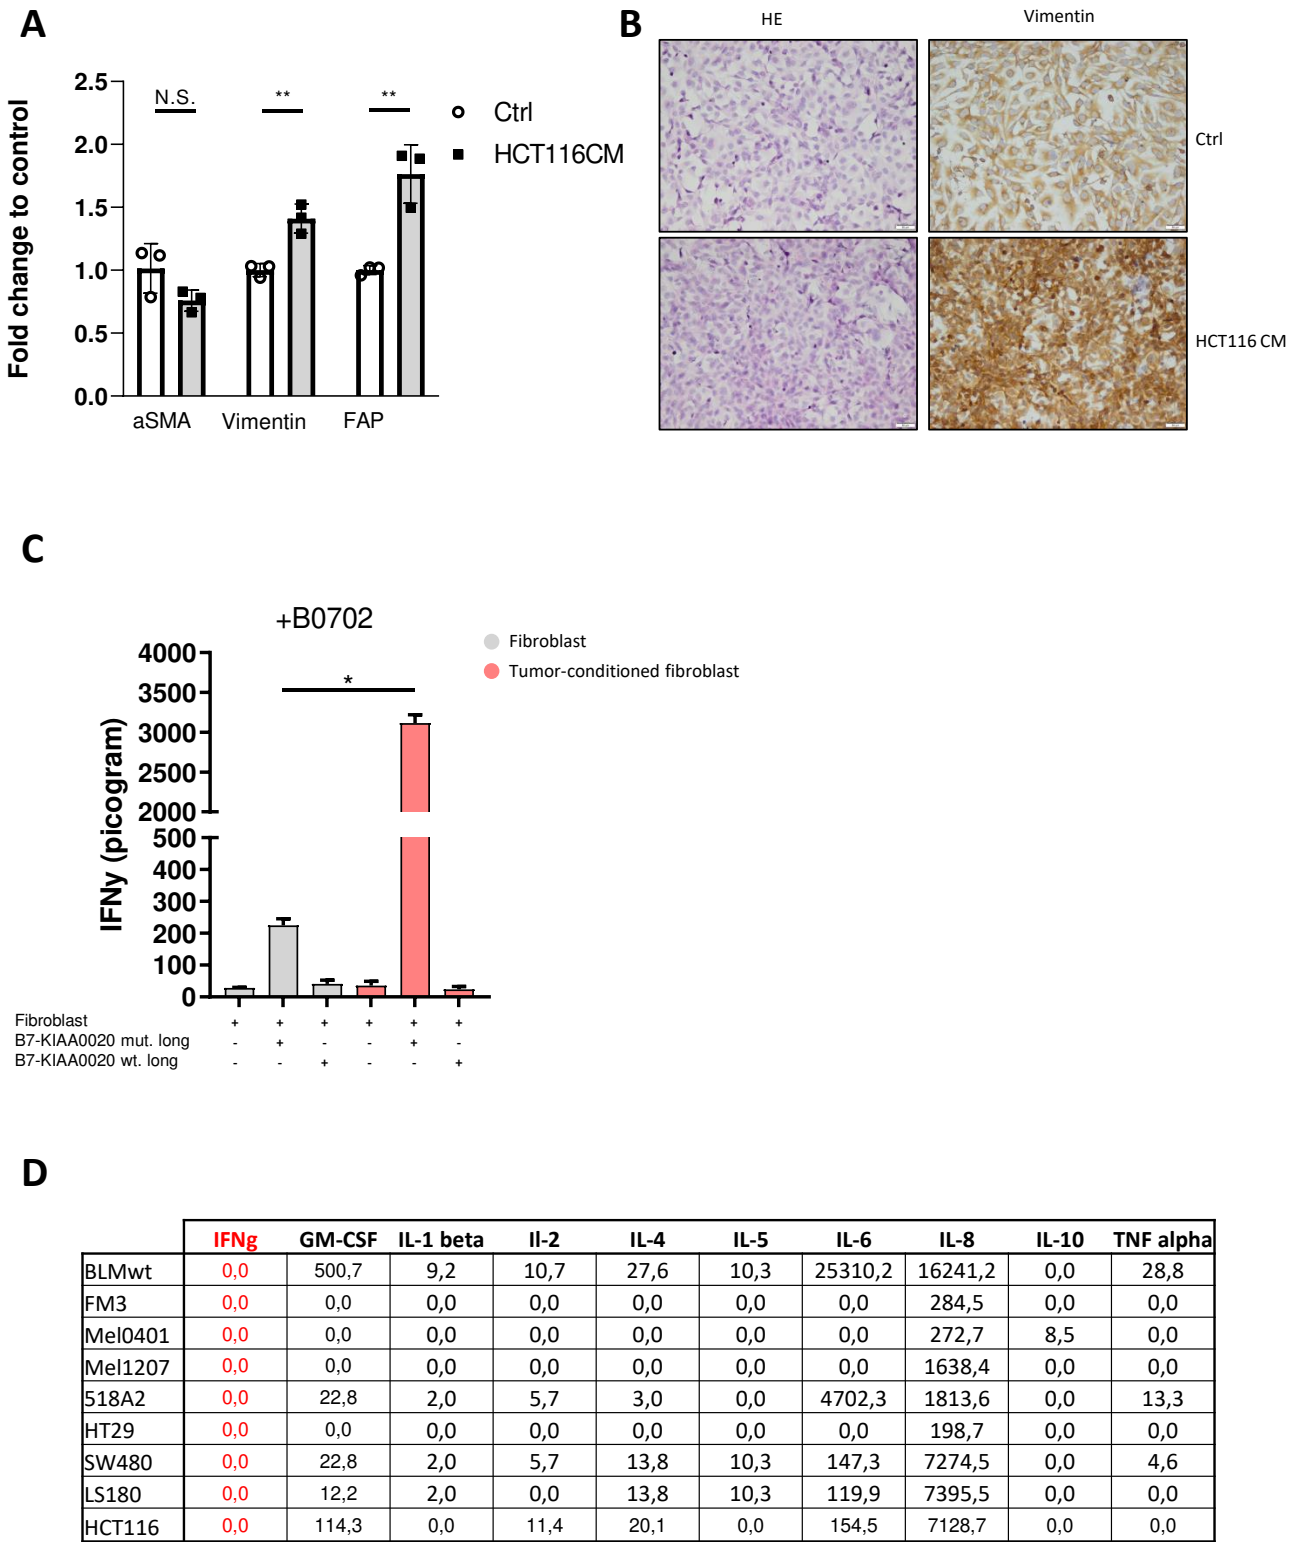

**Supplementary figure 6.** Expression of CAF-markers after CRC-conditioning of fibroblasts. **A** NBS fibroblasts were exposed to CRC-derived (HCT116) conditioned medium and the expression of  $\alpha$ SMA, vimentin and FAP was determined. **B** NBS fibroblasts were seeded on cell-culture slips and were exposed to CRC-conditioned medium or control medium. After 48 hours, cells were stained for vimentin expression. **C** IFN $\gamma$  production by neoantigen-specific T cells after 24h co-incubation with NBS fibroblast (grey) or CRC-conditioned NBS fibroblasts (red) that are loaded with mutated B7-KIAA0020<sup>433-471(p451P>L)</sup> or B7-KIAA0020<sup>433-471(wildtype)</sup> at 20  $\mu$ g/ml. Student's t test  $*=p\leq 0.05$  **D** LUMINEX data showing expression of inflammatory cytokines in CRC and melanoma-derived conditioned media.

# Supplementary Figure 7

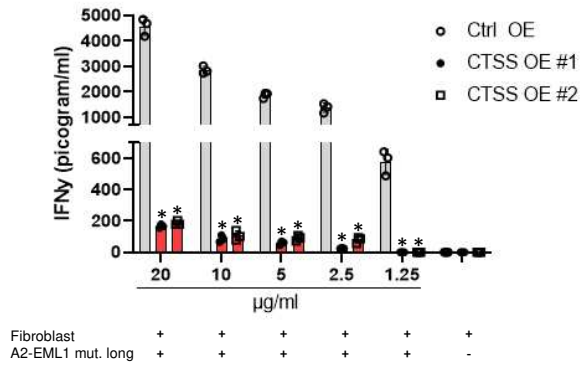

**Supplementary figure 7.** IFN $\gamma$  production by neoantigen-specific T cells after 24h co-incubation with vector control (grey bars) and CTSS overexpressing NBS fibroblasts (red bars) that have been loaded with A2-EML1<sup>50-80(p64R>W)</sup> at indicated concentrations. Means with SD are plotted from representative experiments (n=2). Two-tailed ANOVA with correction for multiple testing \* = P ≤ 0.01

# Supplementary Figure 8

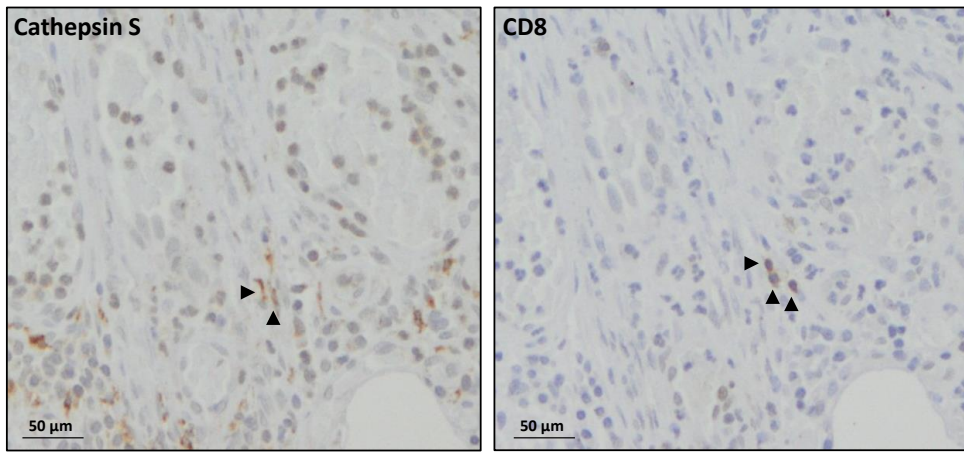

**Supplementary figure 8.** Co-localization of Cathepsin S-expressing fibroblasts and CD8+ T cells on sequential CRC slides. Arrowheads point to Cathepsin S+ fibroblasts (left panel) or CD8+ T cells (right panel).



# Supplementary Figure 9

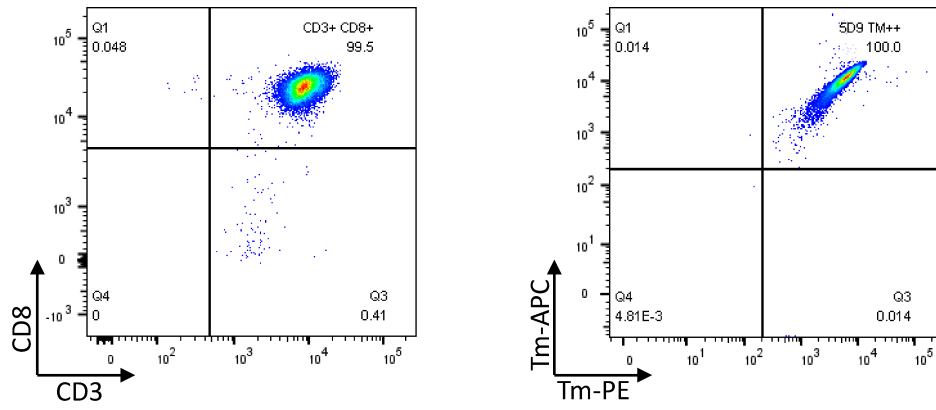

**Supplementary figure 9.** A3-RPL28<sup>74-84</sup> (p76S>F)-sorting of T cells and marker expression. Sorting strategy for A3-RPL28<sup>74-84</sup> (p76S>F)-specific T cells using both PE and APC-labeled tetramers.

# Supplementary Figure 10

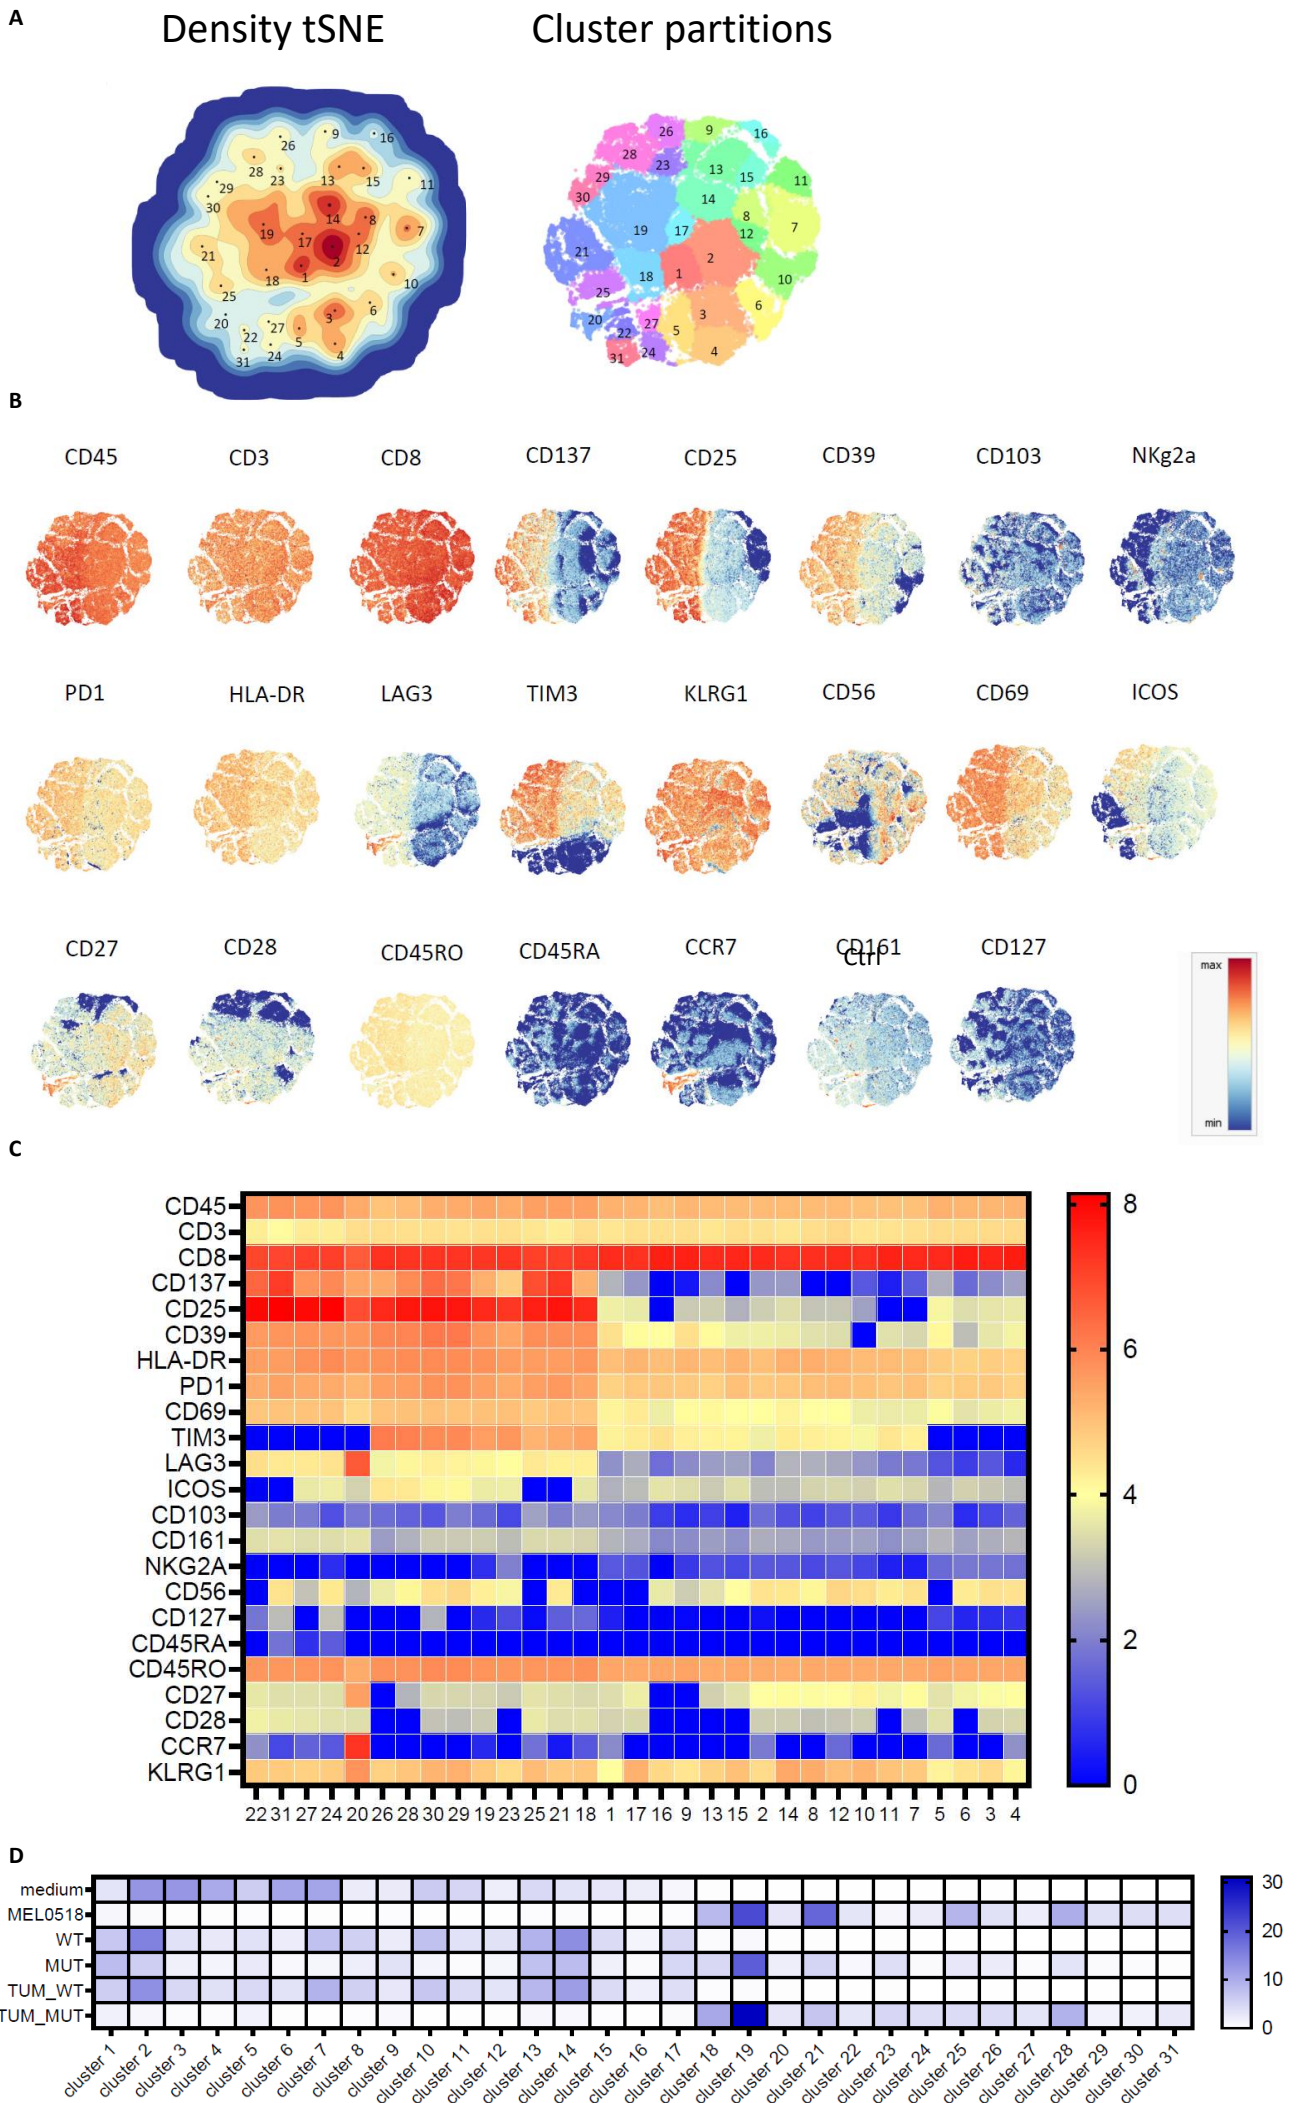

**Supplementary figure 10.** Effect of fibroblast-mediated antigen presentation on T cell marker expression. **A** Density tSNE and cluster partitioning of A3-RPL28<sup>74-84</sup> (p76S>F)-specific T cells for all conditions combined. **B** tSNE plots of Individual marker expression for the entire panel of activating and inhibitory receptors. **C** Relative abundance of markers present in the cluster partitioning. **D** Percentage of T cells in the separate clusters for individual conditions.

# Supplementary Figure 11

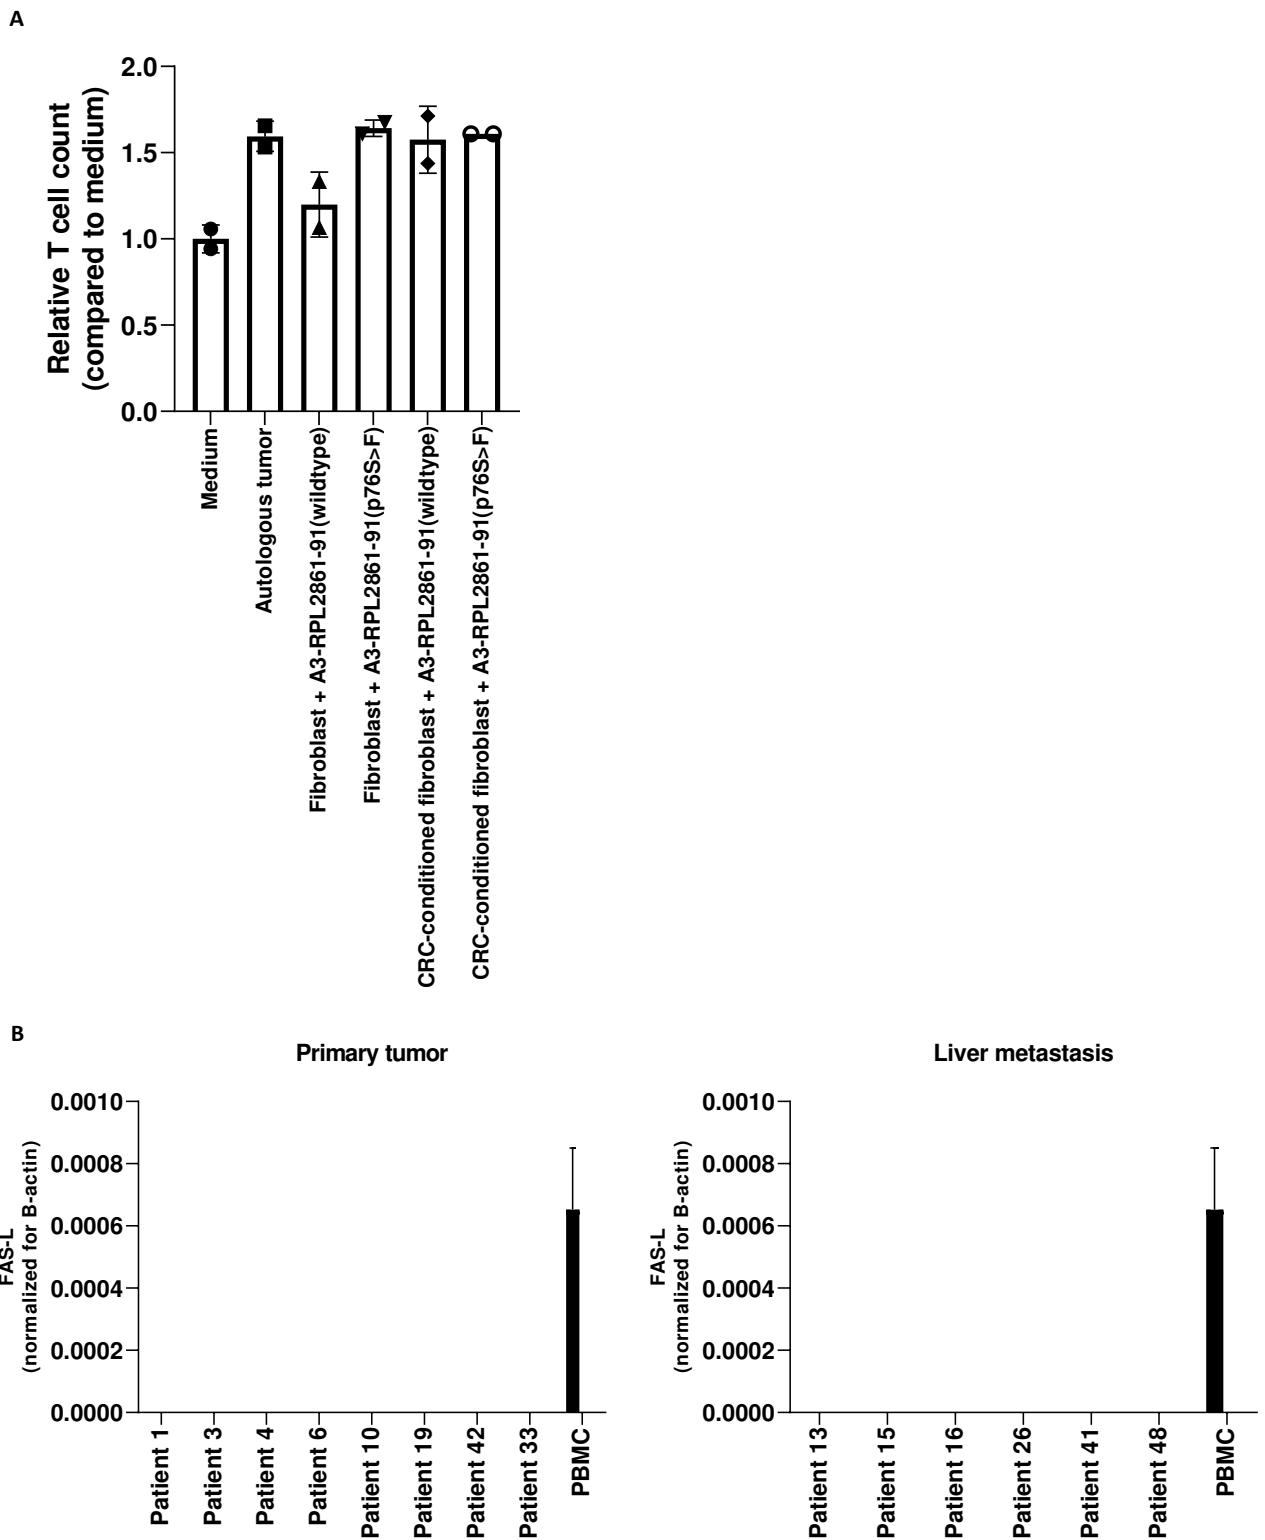

**Supplementary figure 11.** No evidence for FAS-L mediated killing of neoantigen-specific T cells. **A** Relative T cell count of A3-RPL28<sup>74-84</sup>(p76S>F)-specific T cells after pre-incubation with different target conditions for 24 hours. **B** FAS-L ligand expression of primary CRC and CRC-liver metastasis derived CAFs and matched normal fibroblasts. No expression was detected in any of the fibroblasts, peripheral blood mononuclear cells (PBMC) served as a positive control for efficacy of FAS-L specific primers.

# Supplementary Video 1

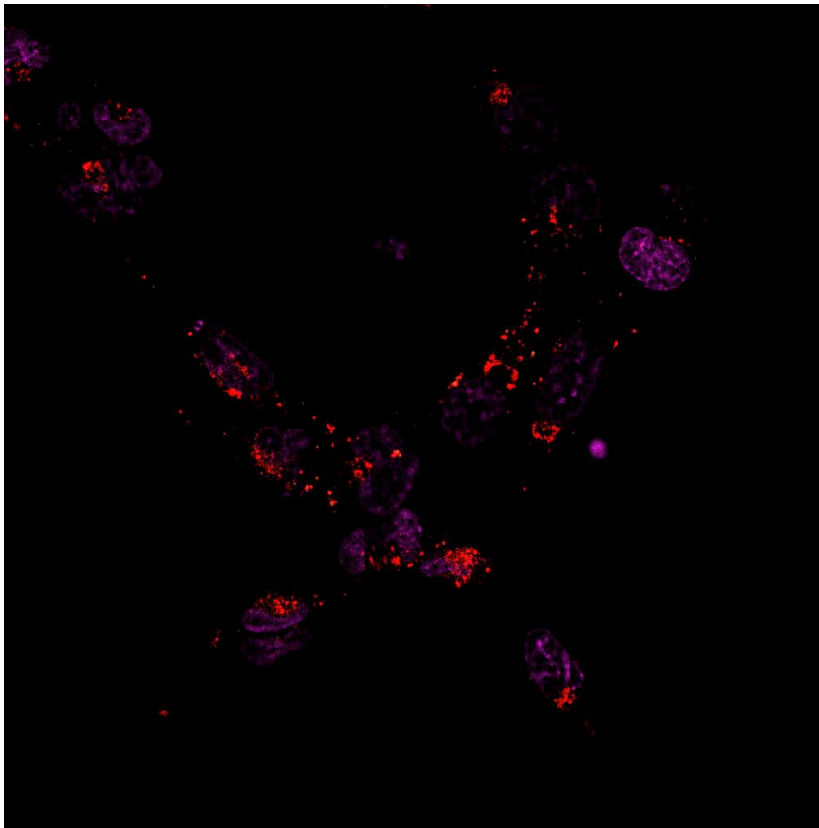

**Supplementary video 1.** Imaging of A3-RPL28<sup>61-91(p76S>F)</sup> processing in fibroblasts. 1-hour clip of A3-RPL28<sup>61-91(p76S>F)</sup> (green) processing in NBS fibroblasts (purple nuclei) with labeling of the lysosomal compartment (red).
